# Supplementary material
Source: PubMed Central journal article supplement (PMC5963255)
Supplement: NIHMS825033-supplement-1.pdf [file NIHMS825033-supplement-1.pdf]

**Figure S1**

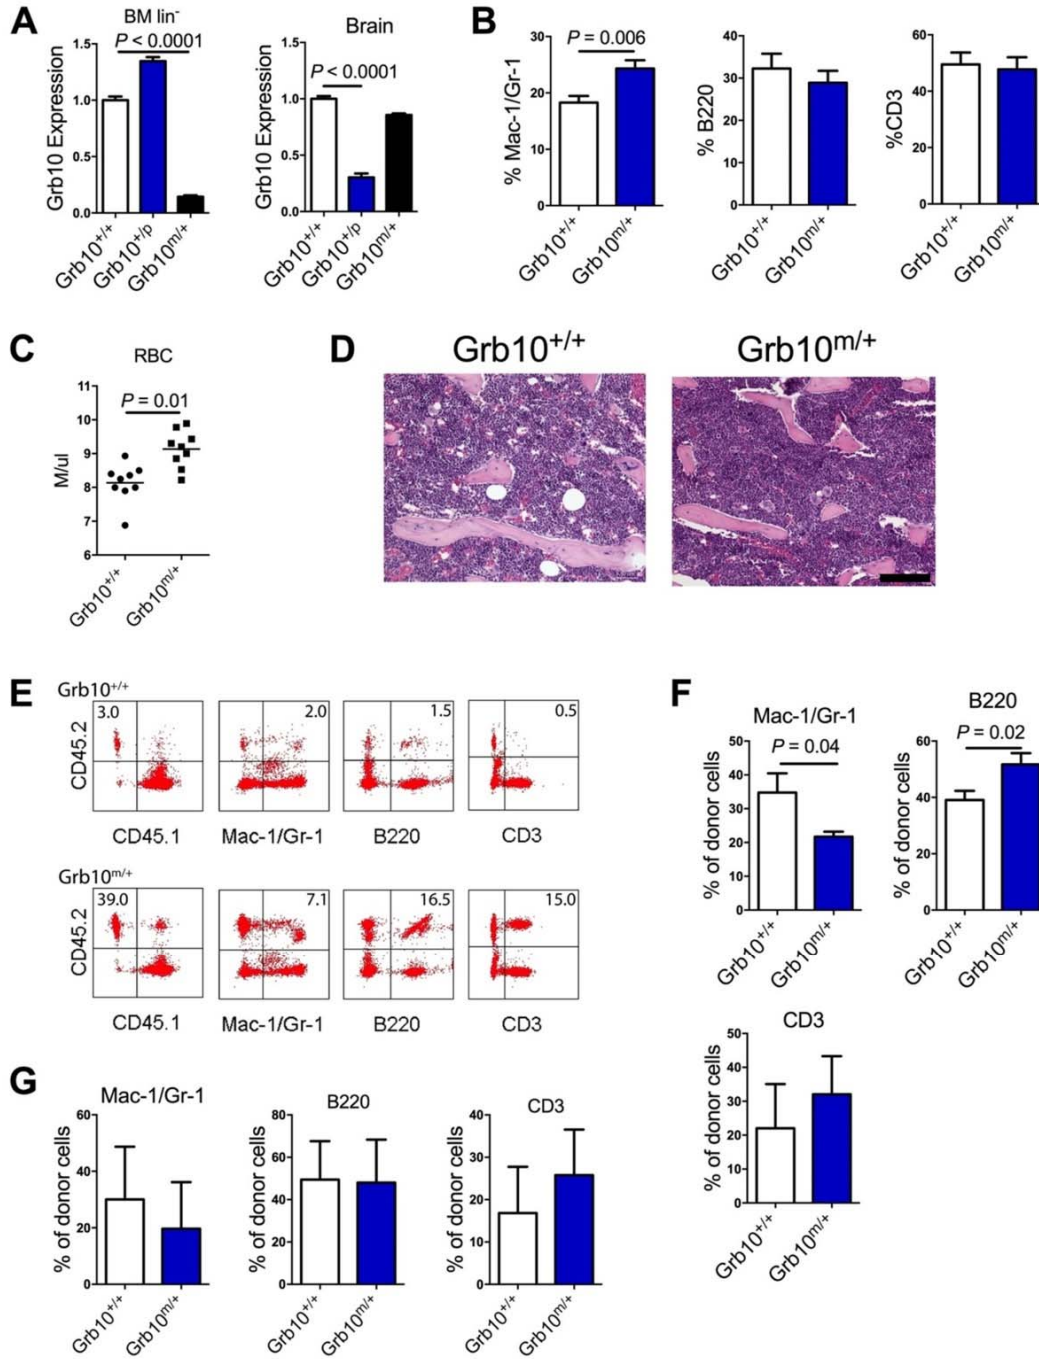

**Figure S1 (related to Figure 2). Phenotype of *Grb10*<sup>m/+</sup> mice and *Grb10*<sup>+/+</sup> mice**

(A) Expression of *Grb10* in BM  $\text{lin}^-$  cells and in the brain of *Grb10*<sup>+/-P</sup> mice and in *Grb10*<sup>m/+</sup> mice (n=3/group). (B) Percentages of PB myeloid cells (Mac-1/Gr-1<sup>+</sup>), B cells (B220<sup>+</sup>) and T cells (CD3<sup>+</sup>) in the PB of *Grb10*<sup>m/+</sup> mice and *Grb10*<sup>+/+</sup> mice (n = 8 mice/group). (C) Scatter plots of peripheral blood red blood cell counts (RBC) in 8 week *Grb10*<sup>m/+</sup> mice and *Grb10*<sup>+/+</sup> mice (n=9 mice/group). (D) Representative H&E staining of femurs from *Grb10*<sup>+/+</sup> mice and *Grb10*<sup>m/+</sup> mice (20x, scale bar=100  $\mu\text{m}$ ). (E) Representative flow cytometric analysis of donor derived CD45.2<sup>+</sup> cells in the PB of recipient CD45.1<sup>+</sup> mice transplanted competitively with  $5 \times 10^4$  BM cells from *Grb10*<sup>+/+</sup> mice or *Grb10*<sup>m/+</sup> mice (and  $2 \times 10^5$  host BM cells) at 20 weeks after BM transplantation. Percentages of donor Mac-1/Gr-1(myeloid), B220(B cell) and CD3 (T cell) cells are shown in the upper right quadrants. (F) Mean percentages of Mac-1/Gr-1<sup>+</sup>, B220<sup>+</sup> and CD3<sup>+</sup> cells as a proportion of total engrafted donor cells in the PB of recipient mice transplanted with *Grb10*<sup>+/+</sup> or *Grb10*<sup>m/+</sup> donor BM cells at 20 weeks after transplantation (n = 8/group, Mann-Whitney test). (G) Mean percentages of Mac-1/Gr-1<sup>+</sup>, B220<sup>+</sup> and CD3<sup>+</sup> cells as a proportion of total engrafted donor cells in the PB of secondary recipient mice transplanted with *Grb10*<sup>+/+</sup> or *Grb10*<sup>m/+</sup> donor BM cells, at 12 weeks after secondary transplantation (n = 10-12/group).

**FIGURE S2**

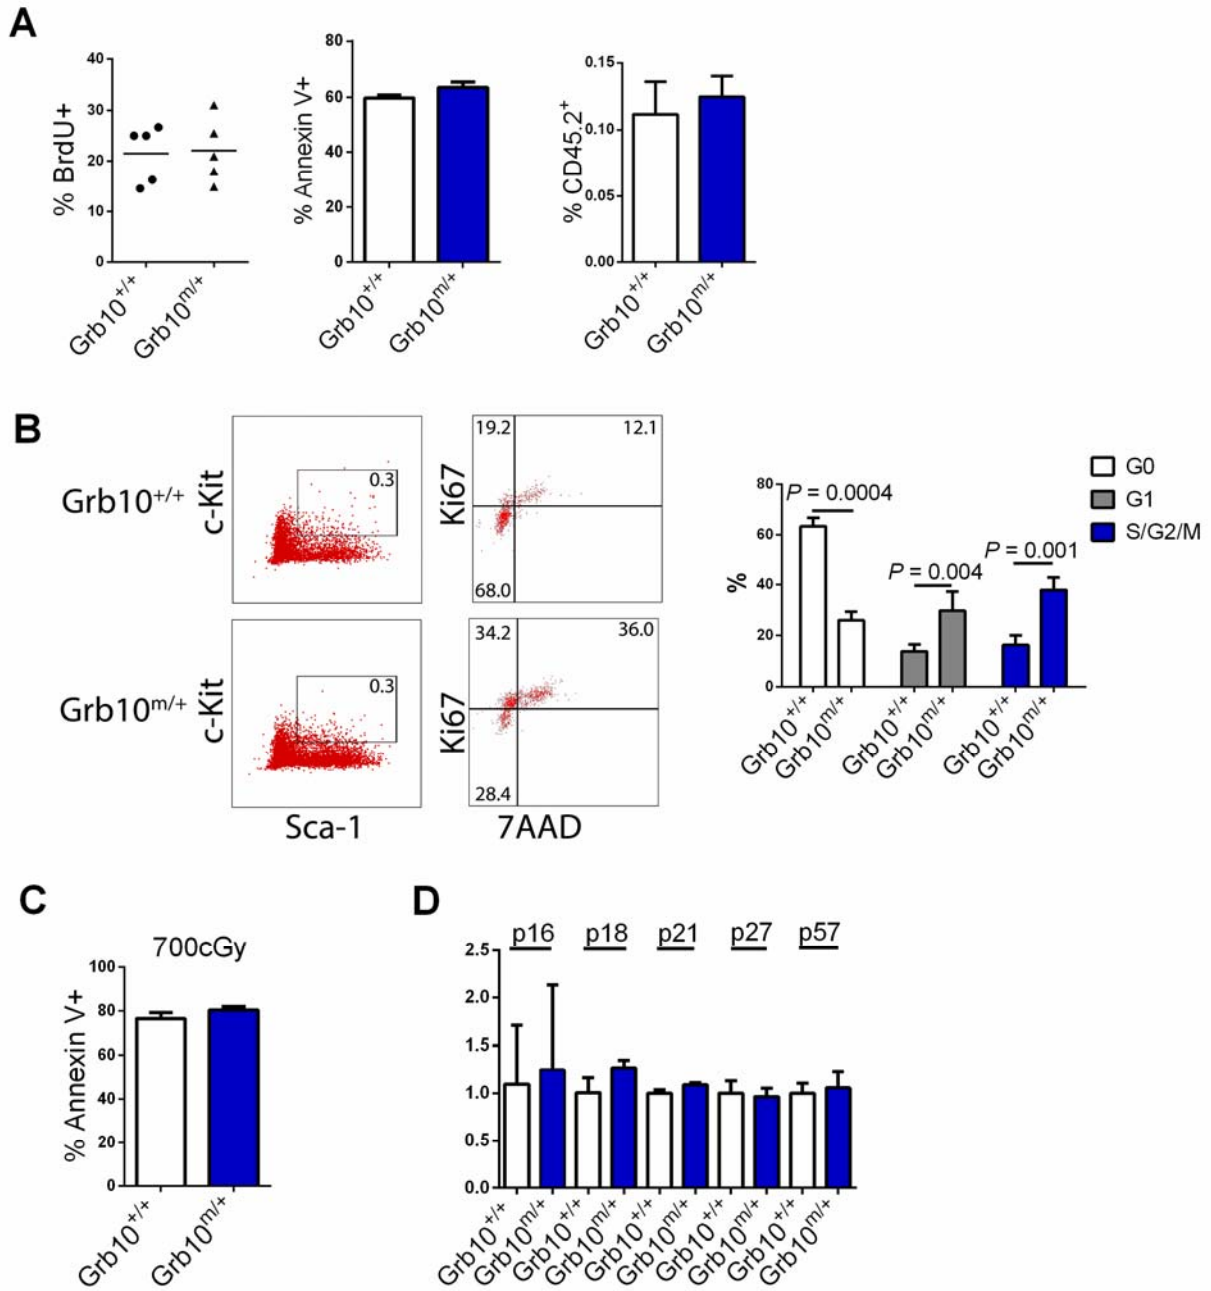

**Figure S2 (related to Figure 4). Grb10 deletion promotes HSC cycling following irradiation**

(A) Mean percentage of BrdU<sup>+</sup> BM SLAMF6<sup>+</sup>KSL cells (left, n = 5 mice /group) and Annexin V<sup>+</sup> KSL cells (center, n = 8 mice/group) in *Grb10*<sup>m/+</sup> mice and *Grb10*<sup>+/+</sup> mice at steady state. At right, mean levels of donor CD45.2<sup>+</sup> cells detected at 18 hours following transplantation of BM sca-1<sup>+</sup>lin<sup>-</sup> cells from *Grb10*<sup>+/+</sup> mice and *Grb10*<sup>m/+</sup> mice in recipient CD45.1<sup>+</sup> mice (n=6/group).

(B) At left, a representative flow cytometric plot is shown of BM KSL cells at 24 hours following 700 cGy in *Grb10*<sup>m/+</sup> mice and *Grb10*<sup>+/+</sup> mice. At center, a representative flow cytometric plot of cell cycle analysis in BM KSL cells is shown. At right, mean percentages of cells in G<sub>0</sub>, G<sub>1</sub> and G<sub>2</sub>/S/M phase in each group (n=4 mice/group).

(C) Mean percentage of Annexin V<sup>+</sup> BM KSL cells in *Grb10*<sup>+/+</sup> mice and *Grb10*<sup>m/+</sup> mice at 24 hours following 700 cGy (n = 8 mice/group).

(D) Expression of cyclin dependent kinase inhibitors in BM KSL cells from *Grb10*<sup>+/+</sup> mice and *Grb10*<sup>m/+</sup> mice at 6 hours following 300 cGy irradiation (n = 6/group).

## FIGURE S3

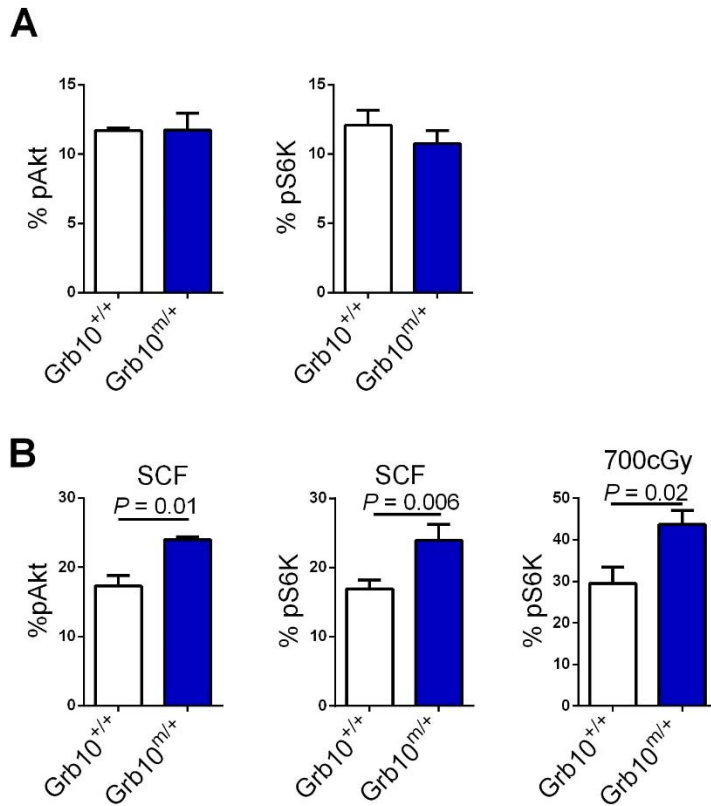

**Figure S3 (related to Figure 4). *Grb10* deletion augments Akt and mTOR activation after SCF stimulation or irradiation** (A) Phosphorylation of Akt and S6 kinase (S6K), a direct target of mTORC1, in BM KSL cells from *Grb10*<sup>+/+</sup> mice and *Grb10*<sup>m/+</sup> mice in steady state (n = 4-8/group). (B) Phosphorylation of Akt in BM KSL cells from *Grb10*<sup>+/+</sup> mice and *Grb10*<sup>m/+</sup> mice at 5 minutes of SCF treatment (left); phosphorylation of S6K in BM KSL cells from *Grb10*<sup>+/+</sup> mice and *Grb10*<sup>m/+</sup> mice at 5 minutes of SCF treatment (center), and at 24 hours after 700 cGy TBI (at right, n = 4-8/group).

**Table S1 (related to Figure 1). Upregulated and downregulated genes in BM KSL cells following high dose irradiation**

| Gene    | Description                                                              | Fold-Change<br>(550cGy vs. 0cGy) | p-value  |
|---------|--------------------------------------------------------------------------|----------------------------------|----------|
| Hba-a1  | hemoglobin alpha, adult chain 1                                          | 9.16117                          | 0.001    |
| Ahsp    | alpha hemoglobin stabilizing protein                                     | 7.51942                          | 0.001218 |
| Mt2     | metallothionein 2                                                        | 7.06283                          | 0.003    |
| Klf1    | Kruppel-like factor 1 (erythroid)                                        | 6.91808                          | 0.000256 |
| Atp1b2  | ATPase, Na <sup>+</sup> /K <sup>+</sup> transporting, beta 2 polypeptide | 5.54998                          | 0.005169 |
| Hspa1b  | heat shock protein 1B                                                    | 5.49593                          | 0.002139 |
| Col5a1  | collagen, type V, alpha 1                                                | 5.3232                           | 0.002098 |
| Mt1     | metallothionein 1                                                        | 5.30729                          | 0.001357 |
| Tjp1    | tight junction protein 1                                                 | 5.11938                          | 3.94E-09 |
| Podxl   | podocalyxin-like                                                         | 4.97906                          | 6.83E-06 |
| Epdr1   | ependymin related protein 1 (zebrafish)                                  | 4.58322                          | 5.75E-05 |
| Ank1    | ankyrin 1, erythroid                                                     | 4.19122                          | 0.000132 |
| Socs2   | suppressor of cytokine signaling 2                                       | 3.64415                          | 0.000803 |
| Grb10   | growth factor receptor bound protein 10                                  | 3.33681                          | 5.85E-07 |
| Gypa    | glycophorin A                                                            | 3.32025                          | 0.01439  |
| Sfrp4   | secreted frizzled-related protein 4                                      | 3.29086                          | 0.000819 |
| Tcrg    | Mus musculus 2 days neonate thymus thymic cells cDNA                     | 3.2588                           | 0.001539 |
| Gja1    | gap junction protein, alpha 1                                            | 3.25332                          | 6.49E-05 |
| Selp    | selectin, platelet                                                       | 3.24308                          | 0.000483 |
| Fam132a | family with sequence similarity 132, member A                            | 3.22703                          | 0.00131  |
| Slamf1  | signaling lymphocytic activation molecule family member 1                | 3.20324                          | 0.000204 |
| Asb17   | ankyrin repeat and SOCS box-containing 17                                | 3.14976                          | 0.004065 |
| Pvt1    | plasmacytoma variant translocation 1                                     | 3.14739                          | 0.002714 |
| Spta1   | spectrin alpha, erythrocytic 1                                           | 3.11081                          | 6.72E-07 |
| Slc38a5 | solute carrier family 38, member 5                                       | 3.09002                          | 0.001255 |
| Pklr    | pyruvate kinase liver and red blood cell                                 | 3.0684                           | 0.027695 |
| Gata1   | GATA binding protein 1                                                   | 3.06067                          | 2.98E-05 |
| Hbb-b2  | hemoglobin, beta adult minor chain                                       | 3.04464                          | 1.86E-05 |
| Plek    | pleckstrin                                                               | -3.00879                         | 4.17E-06 |
| Trim30d | tripartite motif-containing 30D                                          | -3.08386                         | 0.000544 |
| Ldhb    | lactate dehydrogenase B                                                  | -3.1654                          | 2.77E-05 |
| Rora    | RAR-related orphan receptor alpha                                        | -3.26513                         | 0.003363 |
| Robo4   | roundabout homolog 4 (Drosophila)                                        | -3.27413                         | 0.000239 |
| Vegfa   | vascular endothelial growth factor A                                     | -3.28679                         | 0.00354  |
| Ndn     | necdin                                                                   | -3.3007                          | 0.002251 |

|          |                                                             |          |          |
|----------|-------------------------------------------------------------|----------|----------|
| Alcam    | activated leukocyte cell adhesion molecule                  | -3.35081 | 2.92E-05 |
| Cd33     | CD33 antigen                                                | -3.41538 | 0.000259 |
| Adrb2    | adrenergic receptor, beta 2                                 | -3.45489 | 0.000445 |
| Ptms     | parathyrosin                                                | -3.46324 | 2.95E-07 |
| Itgb5    | integrin beta 5                                             | -3.46925 | 7.76E-05 |
| Zbtb20   | zinc finger and BTB domain containing 20                    | -3.54392 | 5.88E-06 |
| Il1r2    | interleukin 1 receptor, type II                             | -3.56333 | 0.000948 |
| Pdgfrb   | platelet derived growth factor receptor, beta polypeptide   | -3.6034  | 0.000796 |
| Ltbp3    | latent transforming growth factor beta binding protein 3    | -3.67145 | 0.000105 |
| Clcf1    | cardiotrophin-like cytokine factor 1                        | -3.70842 | 0.000191 |
| Nr4a3    | nuclear receptor subfamily 4, group A, member 3             | -3.72911 | 0.001252 |
| Itsn1    | intersectin 1 (SH3 domain protein 1A)                       | -3.89208 | 0.000239 |
| Sdc4     | syndecan 4                                                  | -4.01356 | 4.79E-06 |
| Flt3     | FMS-like tyrosine kinase 3                                  | -4.18661 | 9.14E-05 |
| Lif      | leukemia inhibitory factor                                  | -4.29672 | 0.000113 |
| Gcnt2    | glucosaminyl (N-acetyl) transferase 2, I-branching enzyme   | -4.37489 | 0.000195 |
| Satb1    | special AT-rich sequence binding protein 1                  | -4.39525 | 1.25E-05 |
| Ccl4     | chemokine (C-C motif) ligand 4                              | -4.78784 | 0.000473 |
| Serpinf1 | serine (or cysteine) peptidase inhibitor, clade F, member 1 | -5.46444 | 1.37E-07 |
| Dntt     | deoxynucleotidyltransferase, terminal                       | -6.3669  | 2.25E-07 |
| Ccl3     | chemokine (C-C motif) ligand 3                              | -6.80125 | 9.32E-06 |
| Wfdc18   | WAP four-disulfide core domain 18                           | -7.46518 | 1.29E-08 |
